# Supplementary material
Source: publisher figshare collection journal article supplement (https://sage.figshare.com/ndownloader/files/13327364)

## Gln

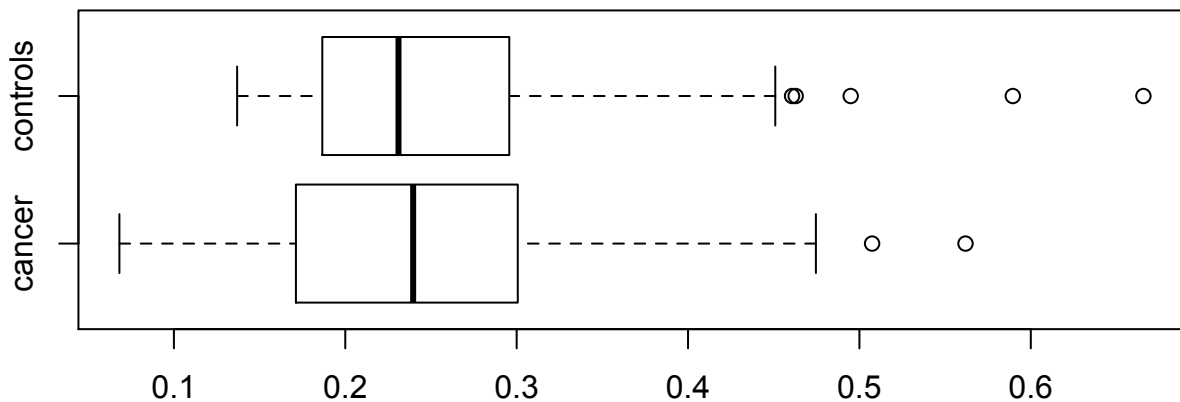

## Met

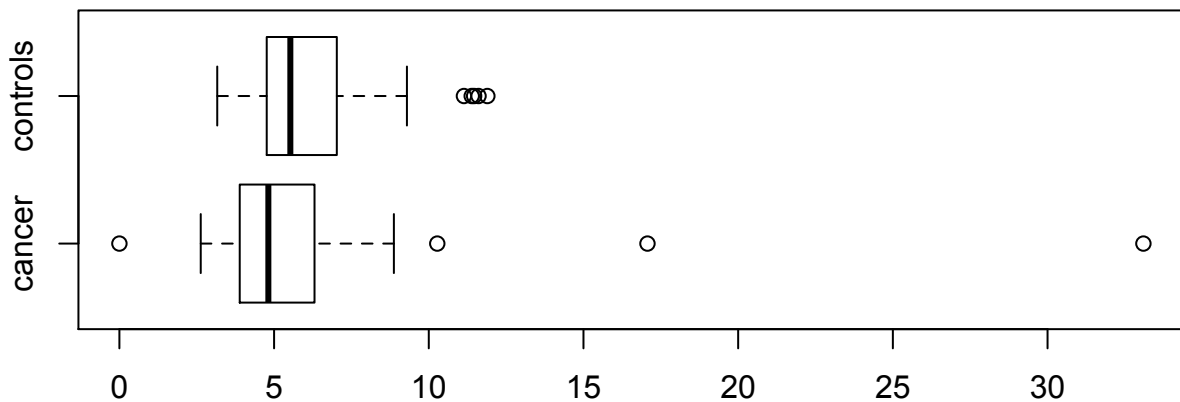

Supplement: Supplementary file 1 [file 13327364]

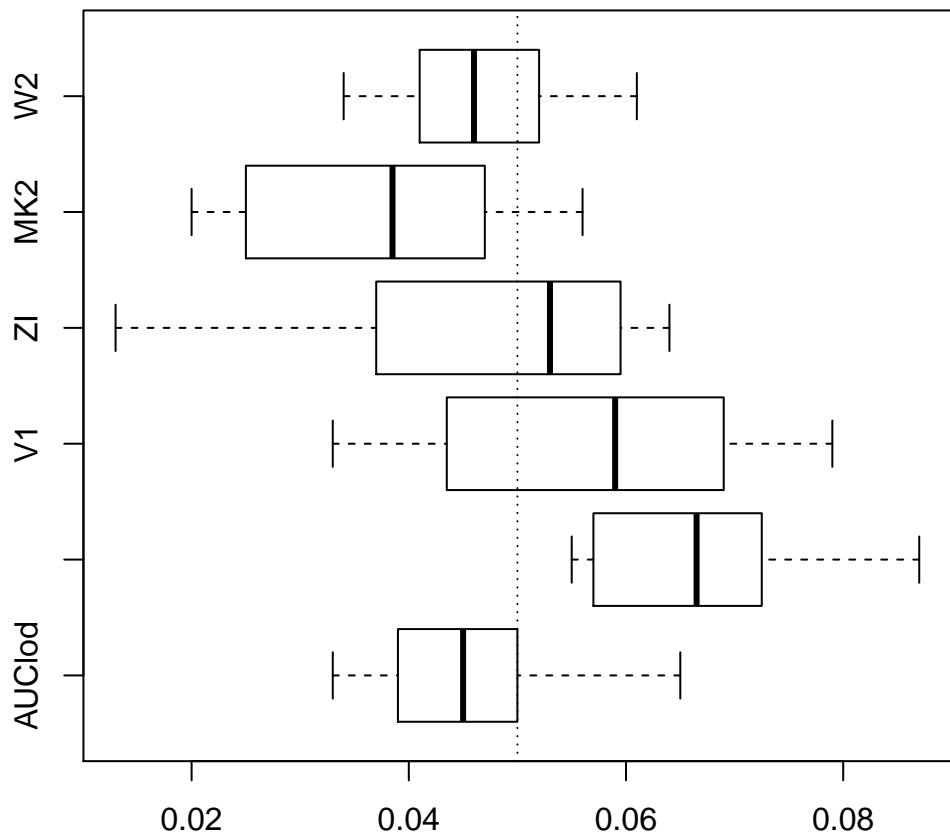

Supplement: Supplementary file 2 [file 13327364]

**Normal Q-Q Plot for Gln**

Sample Quantiles

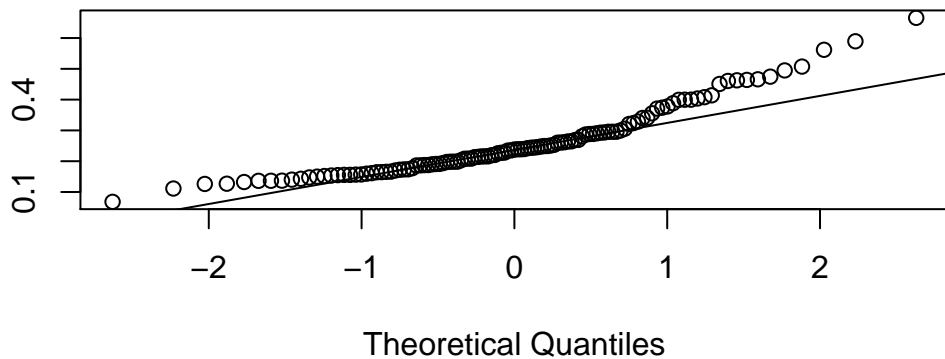

**Normal Q-Q Plot for Met**

Sample Quantiles

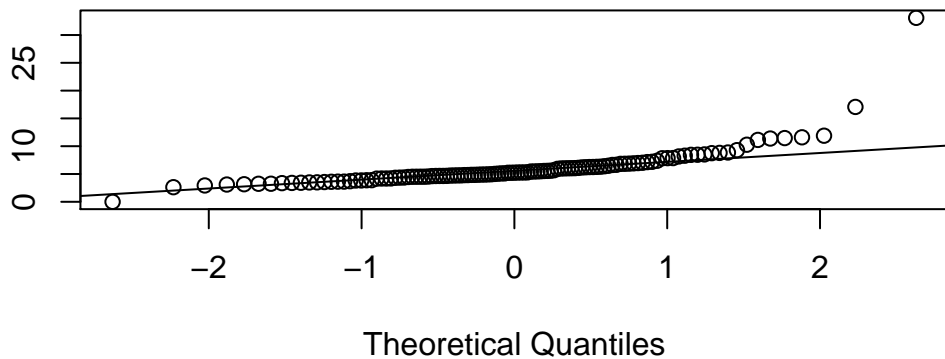

Supplement: Supplementary file 3 [file 13327364]
